# Supplementary material
Source: PubMed Central journal article supplement (PMC1895638)
Supplement: bmj_334_7607_1313__1.pdf [file bmj_334_7607_1313__1.pdf]

- (W1) Cherkin DC, Deyo RA, Loeser JD, Bush T, Waddell G. An international comparison of back surgery rates. *Spine* 1994;19:1201-6.
- (W2) Health Council of the Netherlands: management of the lumbosacral radicular syndrome (sciatica): Health Council of the Netherlands, 1999; publication no. 1999/18.
- (W3) Boden SD, Davis DO, Dina TS et al. Abnormal magnetic resonance scans of the lumbar spine in asymptomatic subjects. *J Bone Joint Surg* 1990;72:403-408.
- (W4) Mens JMA, Chavannes AW, Koes BW, Lubbers WJ, Ostelo RWJG, Spinnewijn WEM, Kolnaar BGM. NHG-Standaard Lumbosacraal radiculair syndroom (in Dutch). *Huisarts Wet* 2005;48:178-178
- (W5) Waddell G. *The back pain revolution*. Edinburgh: Churchill Livingstone, 1998.
